# Supplementary material
Source: publisher figshare collection journal article supplement (https://acs.figshare.com/ndownloader/files/13125761)
Supplement: Supplementary file 1 [file 13125761]

# Supporting Information for: Predicting Thermodynamic Properties of Alkanes by High-throughput Force Field Simulation and Machine Learning

*Zheng Gong, Yanze Wu, Liang Wu and Huai Sun\**

School of Chemistry and Chemical Engineering, Materials Genome Initiative Center, and Key Laboratory of Scientific and Engineering Computing of Ministry of Education, Shanghai Jiao Tong University, Shanghai, China 200240

\*To whom the correspondence should be addressed: [huaisun@sjtu.edu.cn](mailto:huaisun@sjtu.edu.cn)

## 1. Details of molecules

The details of 876 molecules are listed in the attached Excel (.xlsx) file. The formula, CAS number, name, melting point ( $T_m$ ), normal boiling point ( $T_{vap}$ ) and critical point ( $T_c$ ) are taken from Yaws' Critical Property Data for Chemical Engineers and Chemists<sup>1</sup>. The SMILES string are obtained by using NCBI PubChem PUG API<sup>2</sup>. For molecule whose melting point is not available, the lowest temperature for simulation is set to  $0.4 * T_{vap} + 100K$ . For those molecules whose critical point is not available, the highest temperature is set to  $T_{vap} + 75K$  for liquid simulation or  $T_{vap} + 100K$  for VLE simulation.

## 2. Categories of molecules

Table S1 Number of different type of alkanes and representative structures. Note that one molecule can belong to several categories

| Category       | Number | Representative structures                                                            |
|----------------|--------|--------------------------------------------------------------------------------------|
| normal alkane  | 19     |  |
| iso-alkane     | 743    |  |
| neo-alkane     | 410    |  |
| cyclic alkane  | 186    |  |
| cyclopropane   | 14     |  |
| cyclobutane    | 7      |  |
| cyclopentane   | 62     |  |
| cyclohexane    | 93     |  |
| bicyclo-alkane | 13     |  |

### 3. Convergence of vacuum simulation for dodecane at 288 K

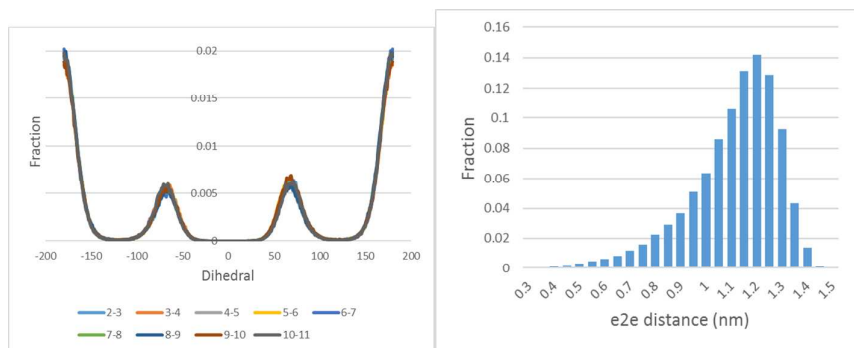

Figure S1 Distributions of nine C-C-C-C dihedral angles ('2-3' denotes the dihedral formed by C1-C2-C3-C4), and distribution of the end-to-end distances for dodecane at 288 K in vacuum simulation.

### 4. Distributions of kinetic energies of VLE simulation

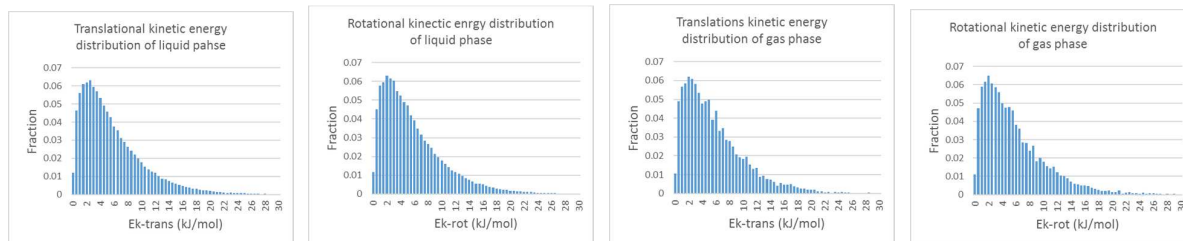

Figure S2 Distributions of translational and rotational kinetic energy of molecules in liquid phase and gas phase in VLE simulation for decane at 466 K.

### 5. Vapor-Liquid-Equilibria Phase Diagrams and Clausius-Clapeyron plots

The VLE phase diagrams of 240 molecules are compared against experimental data taken from NIST Standard Reference Database 103b<sup>3-5</sup>, As shown in Figure S3. The Clausius-Clapeyron plots are given in Figure S4.

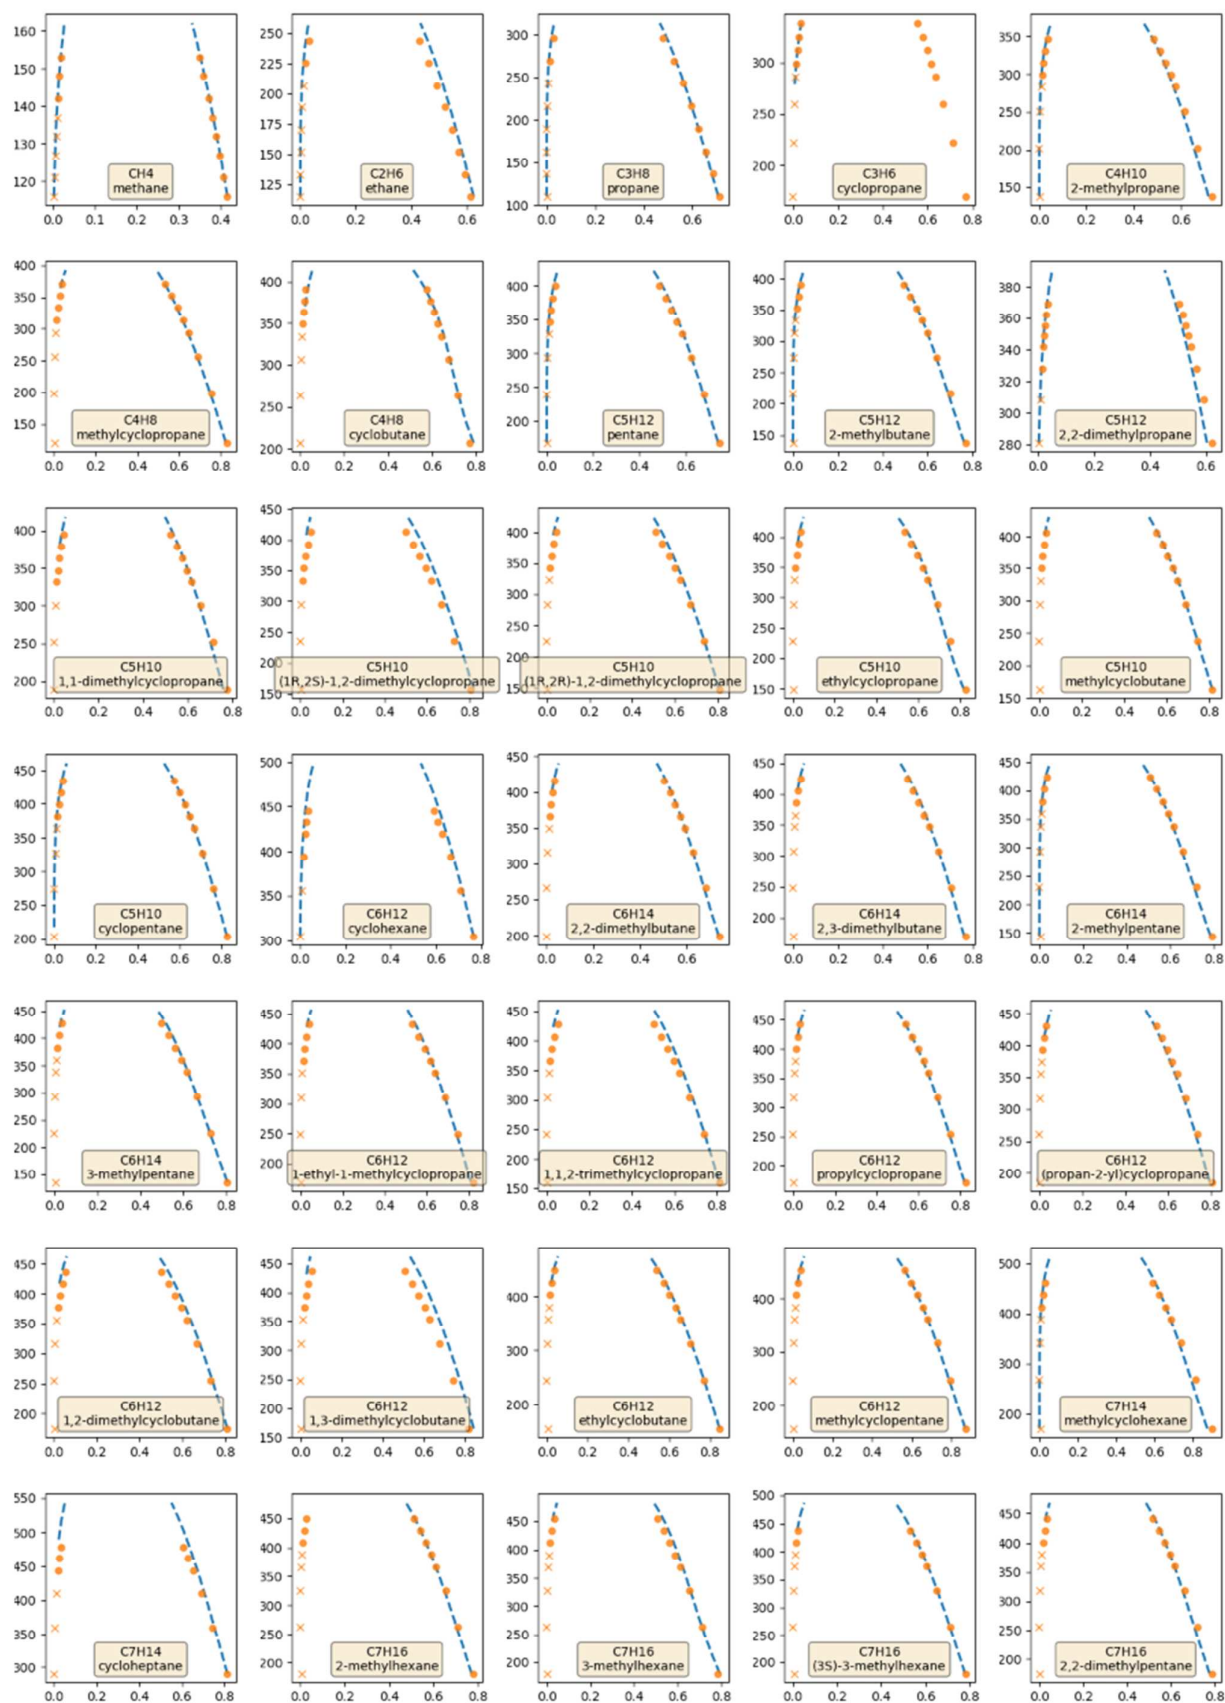

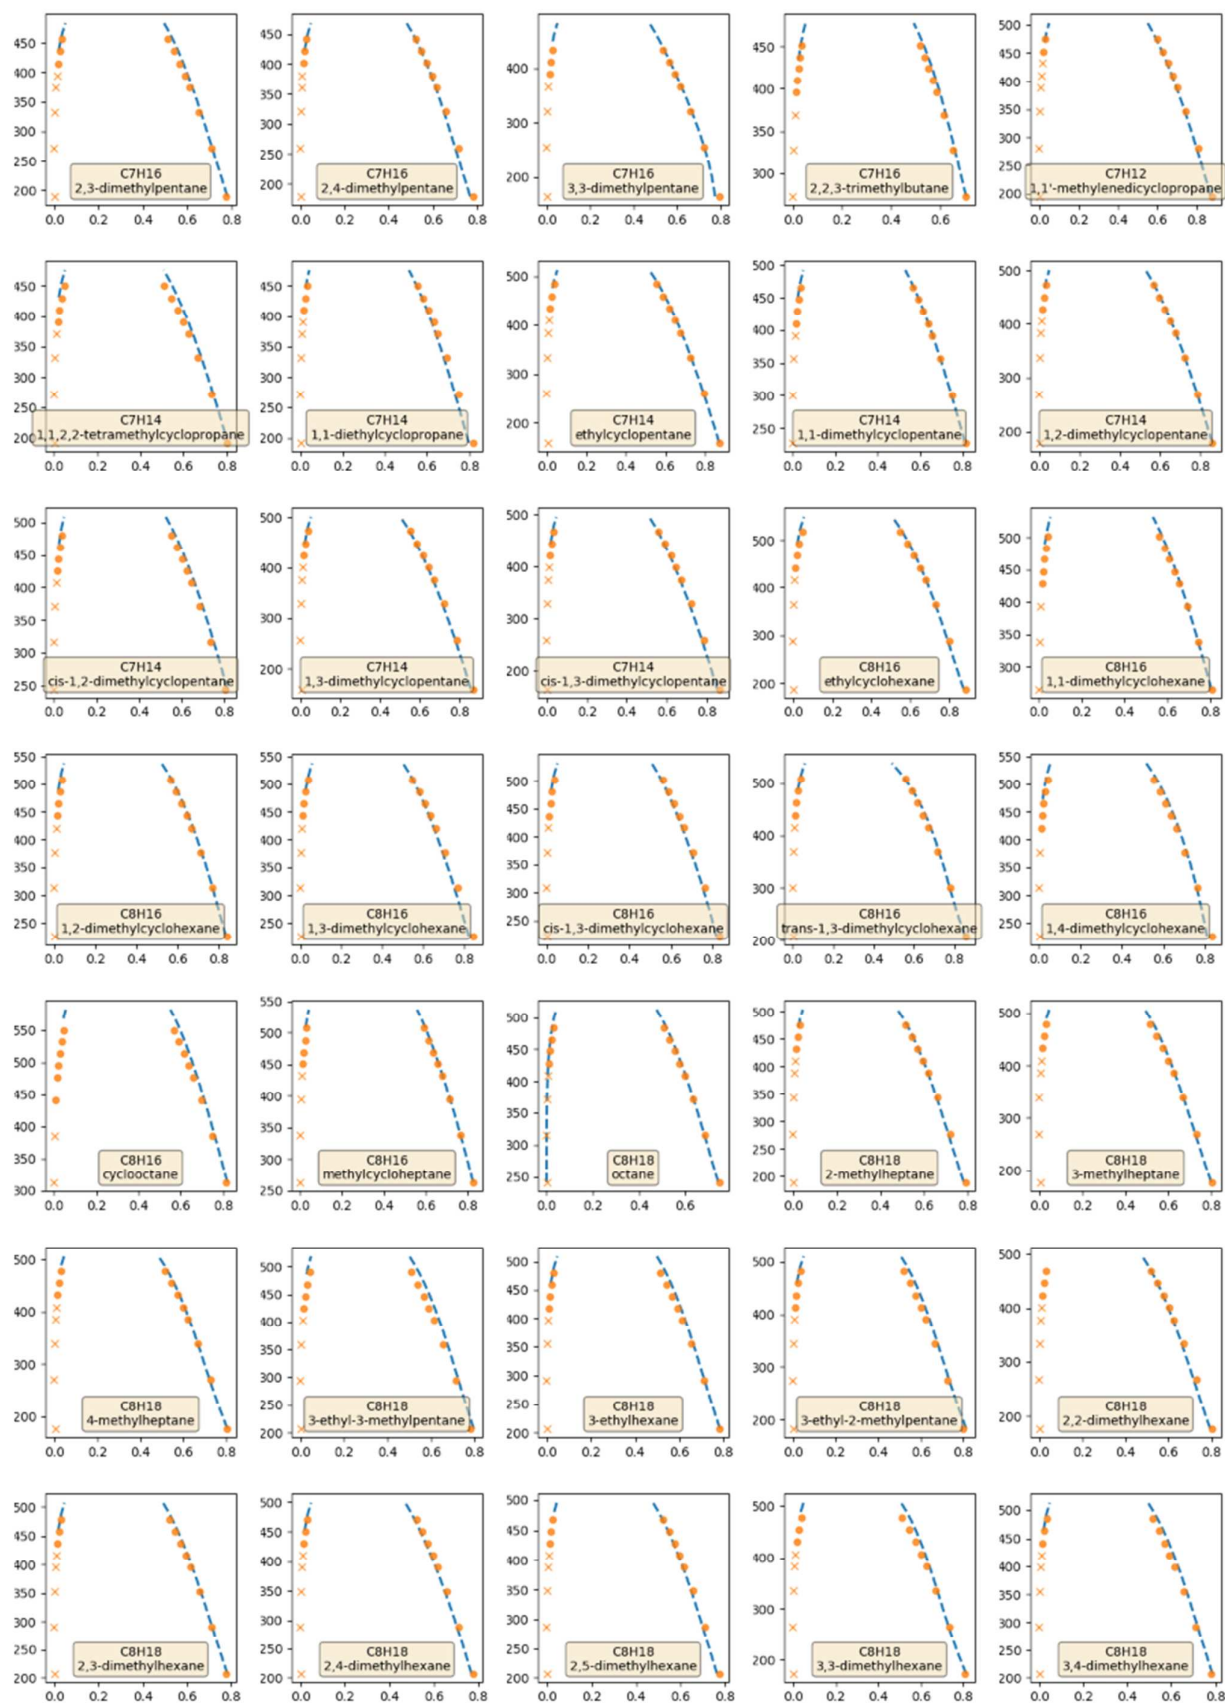

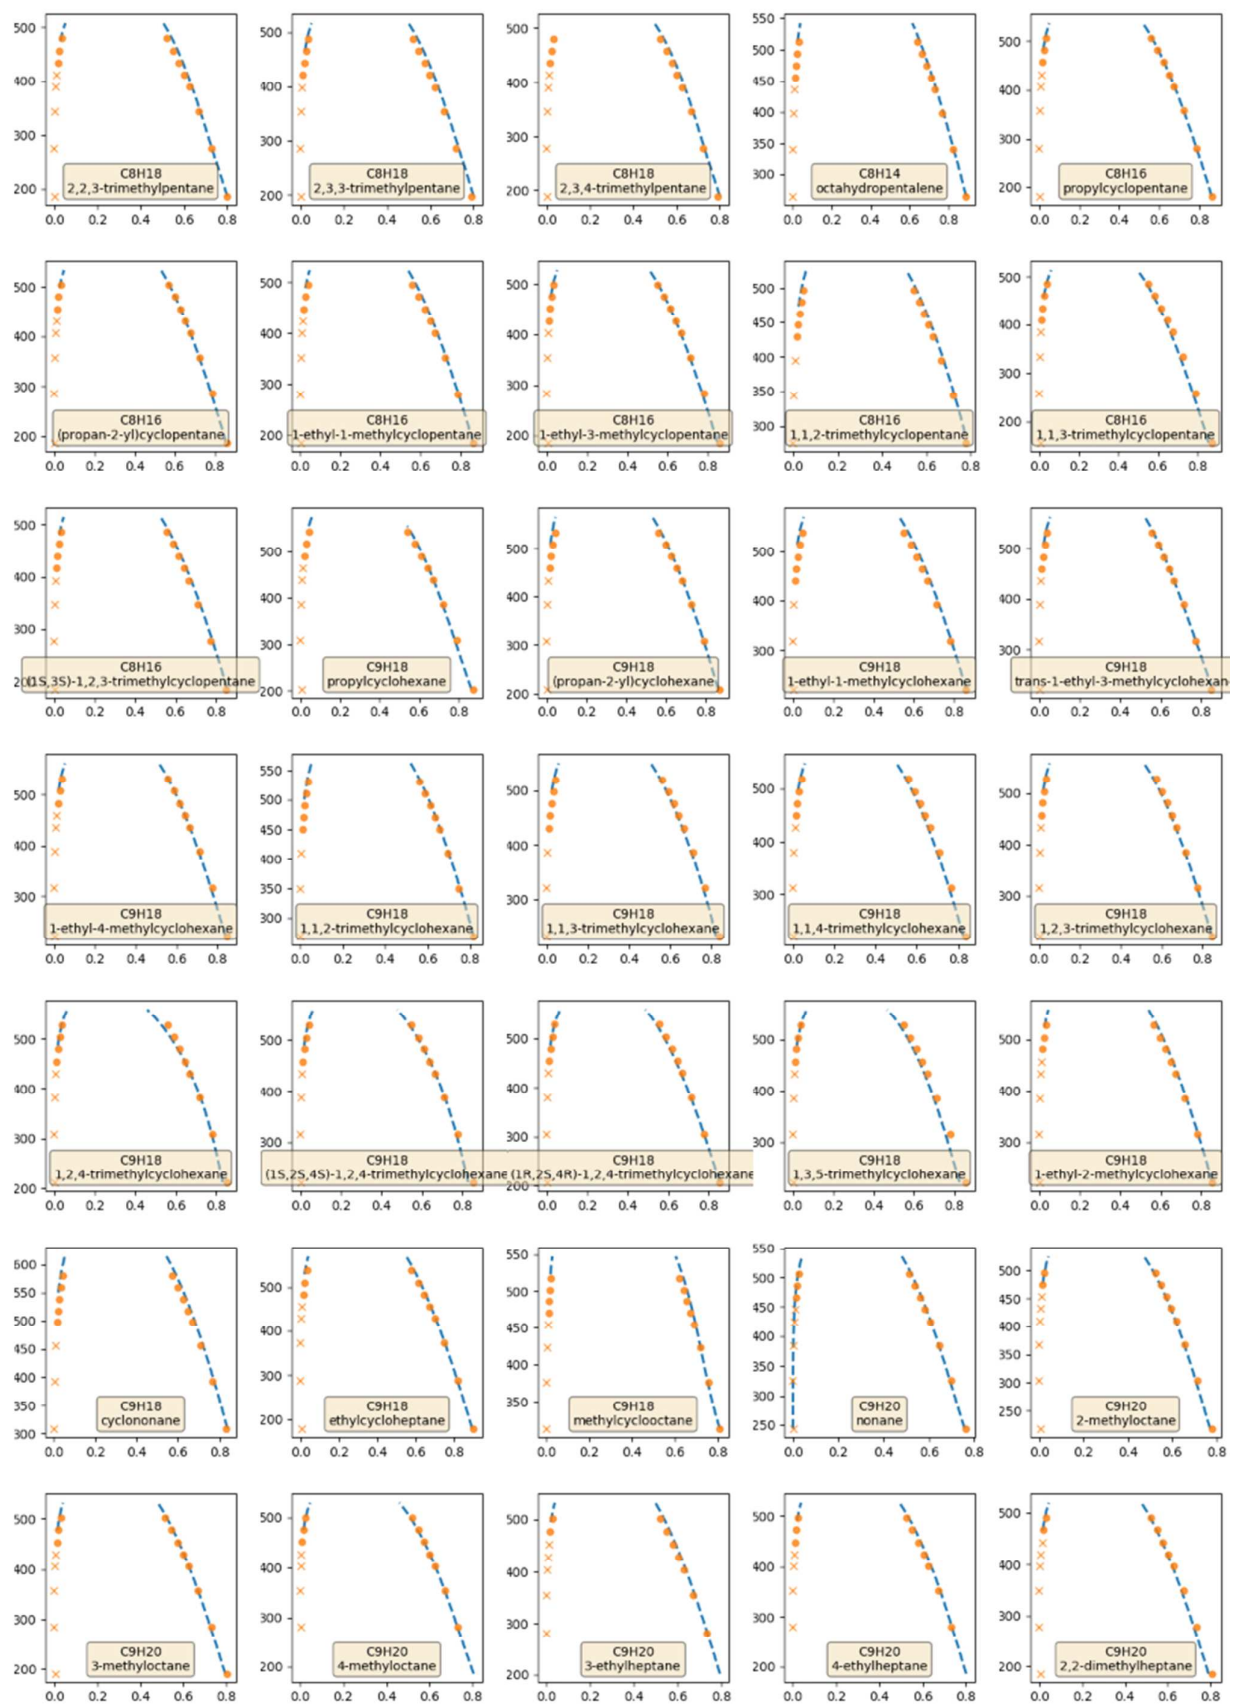



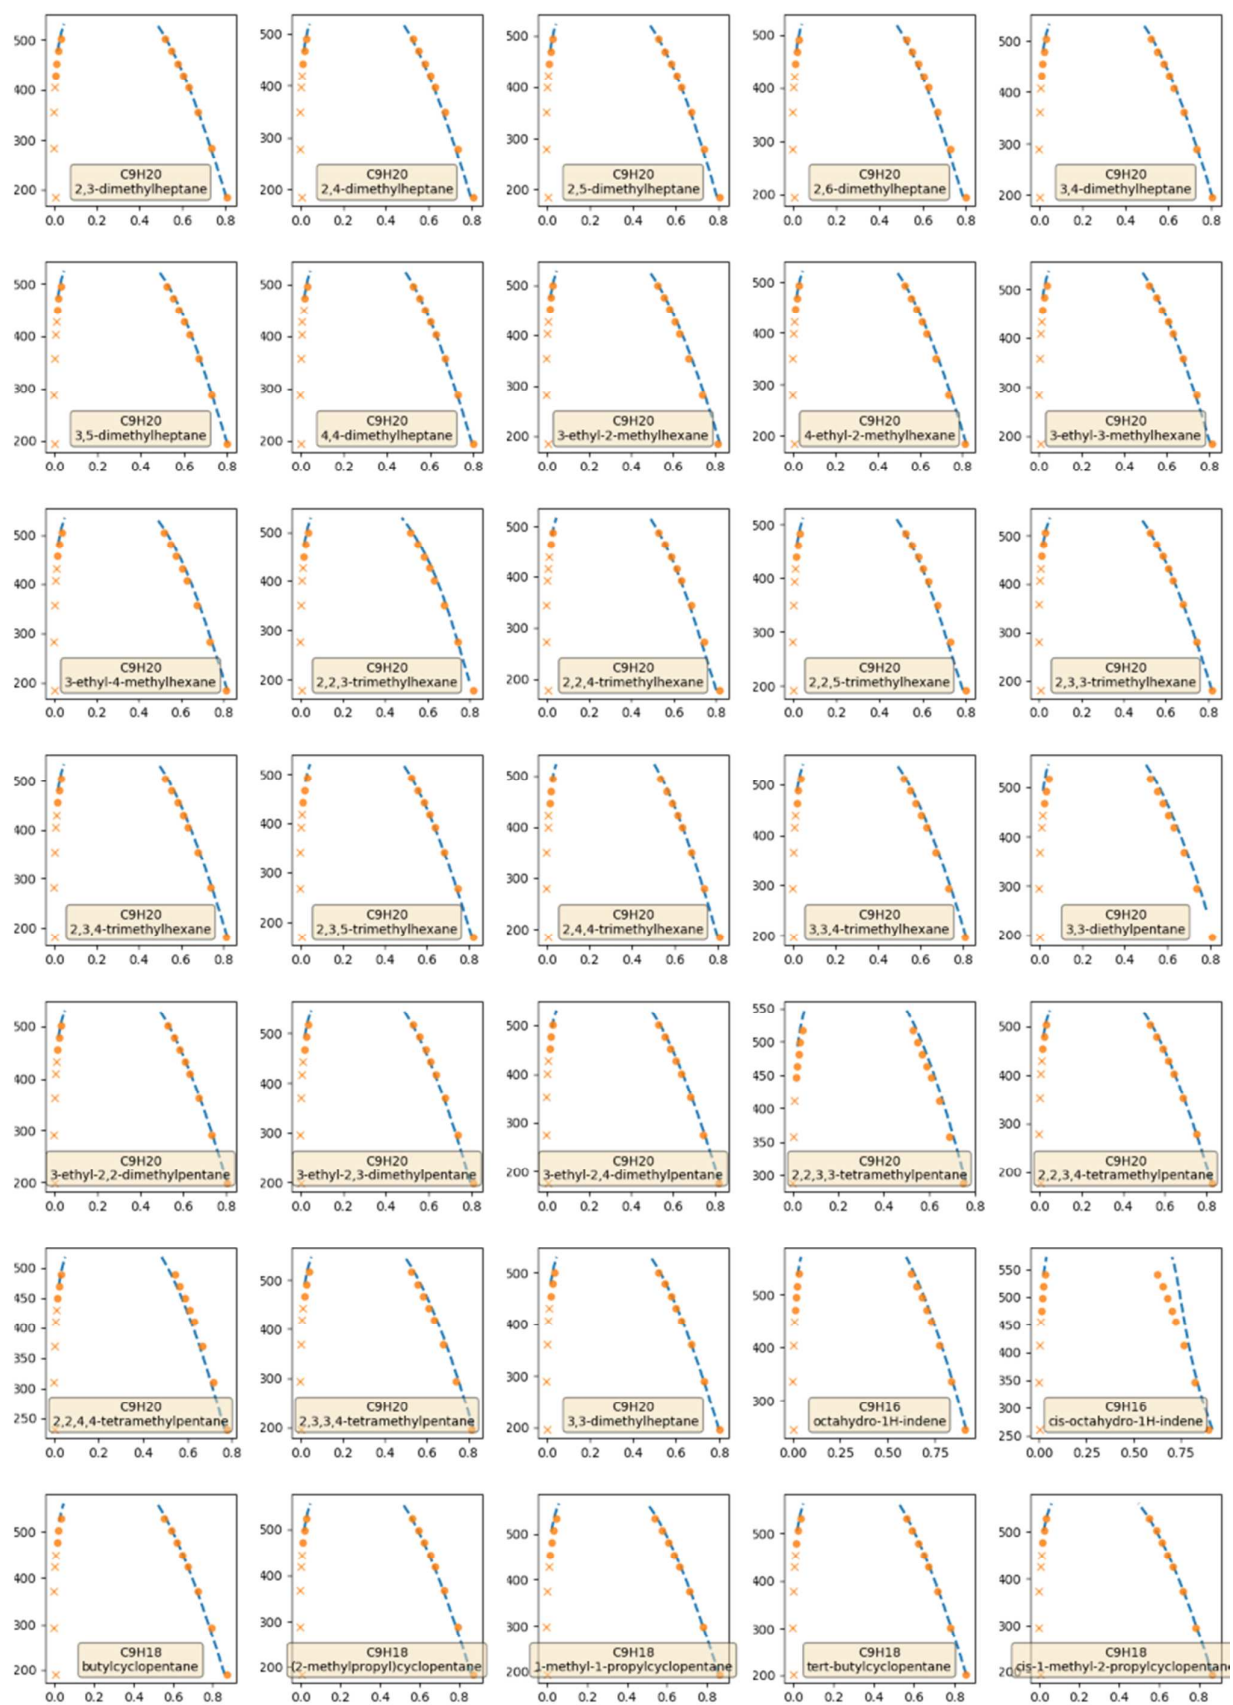

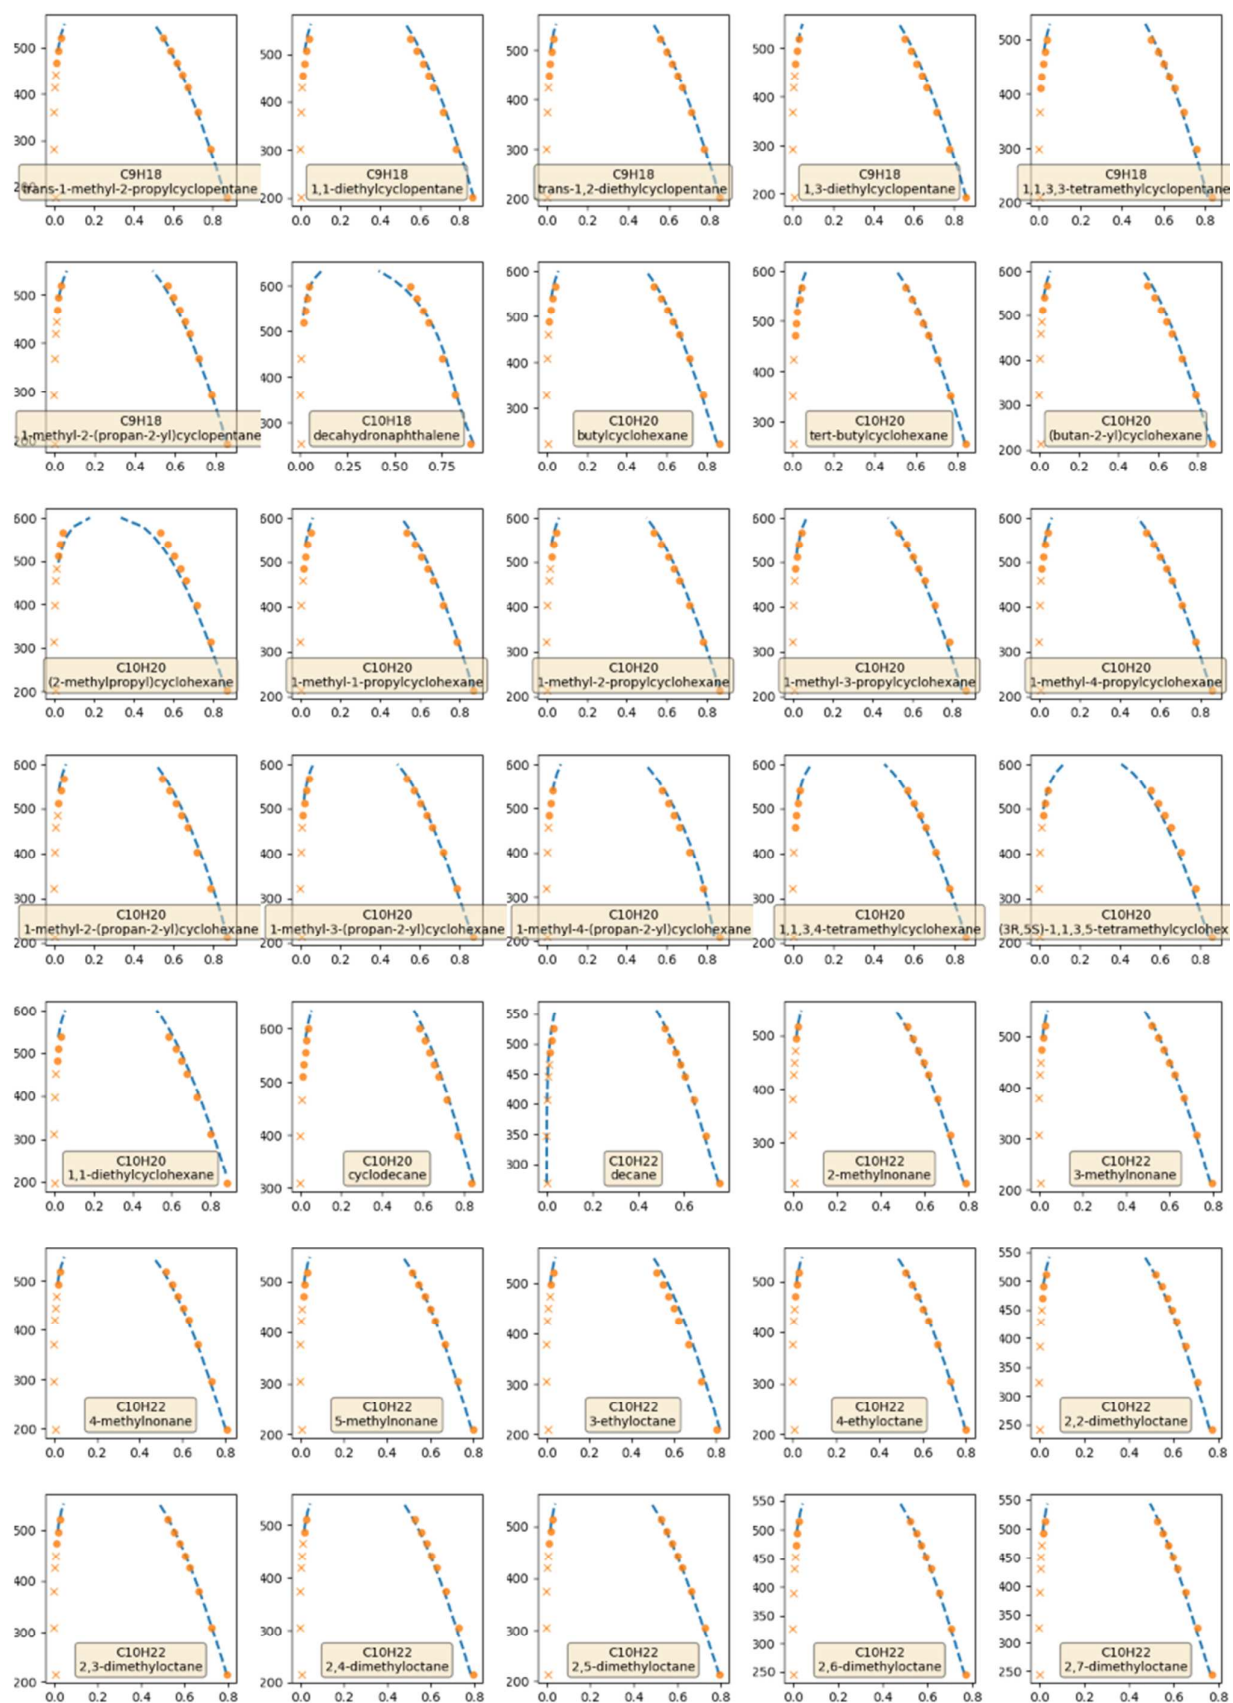



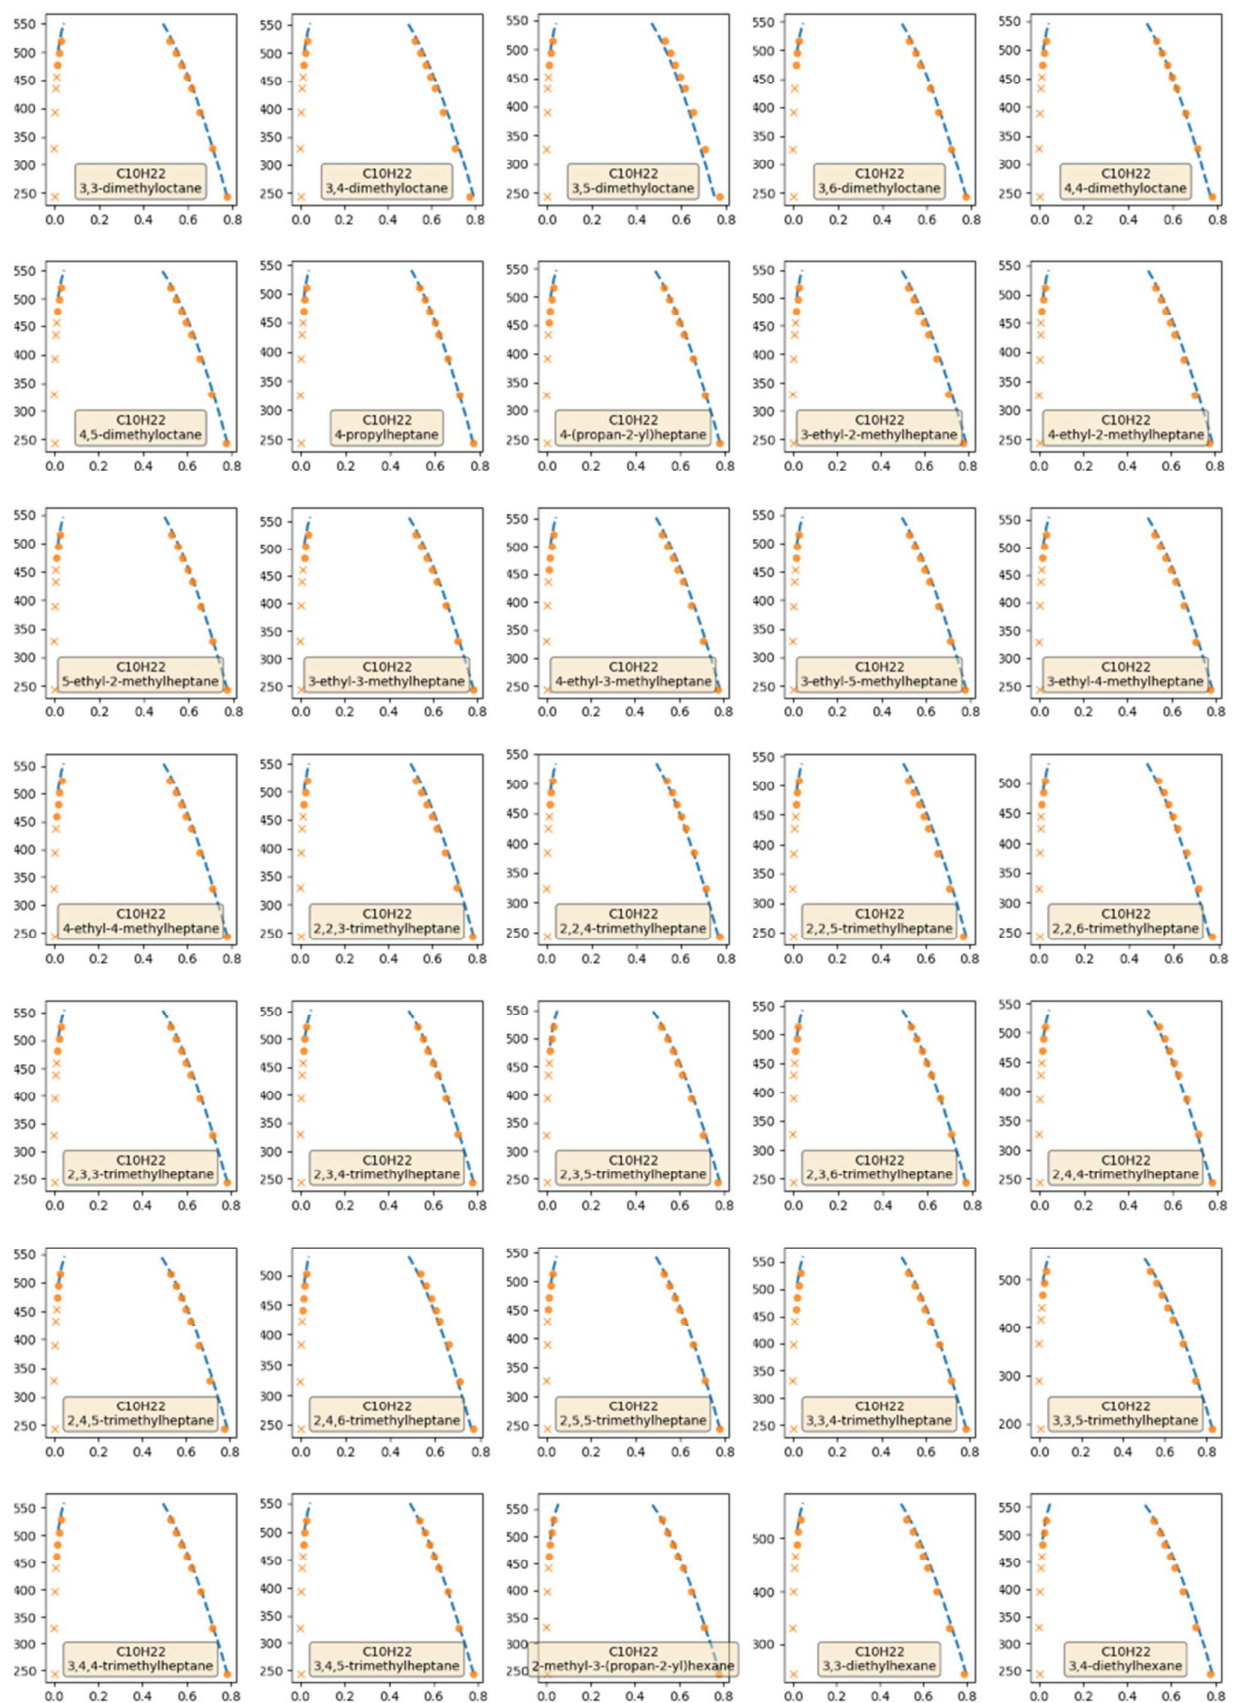

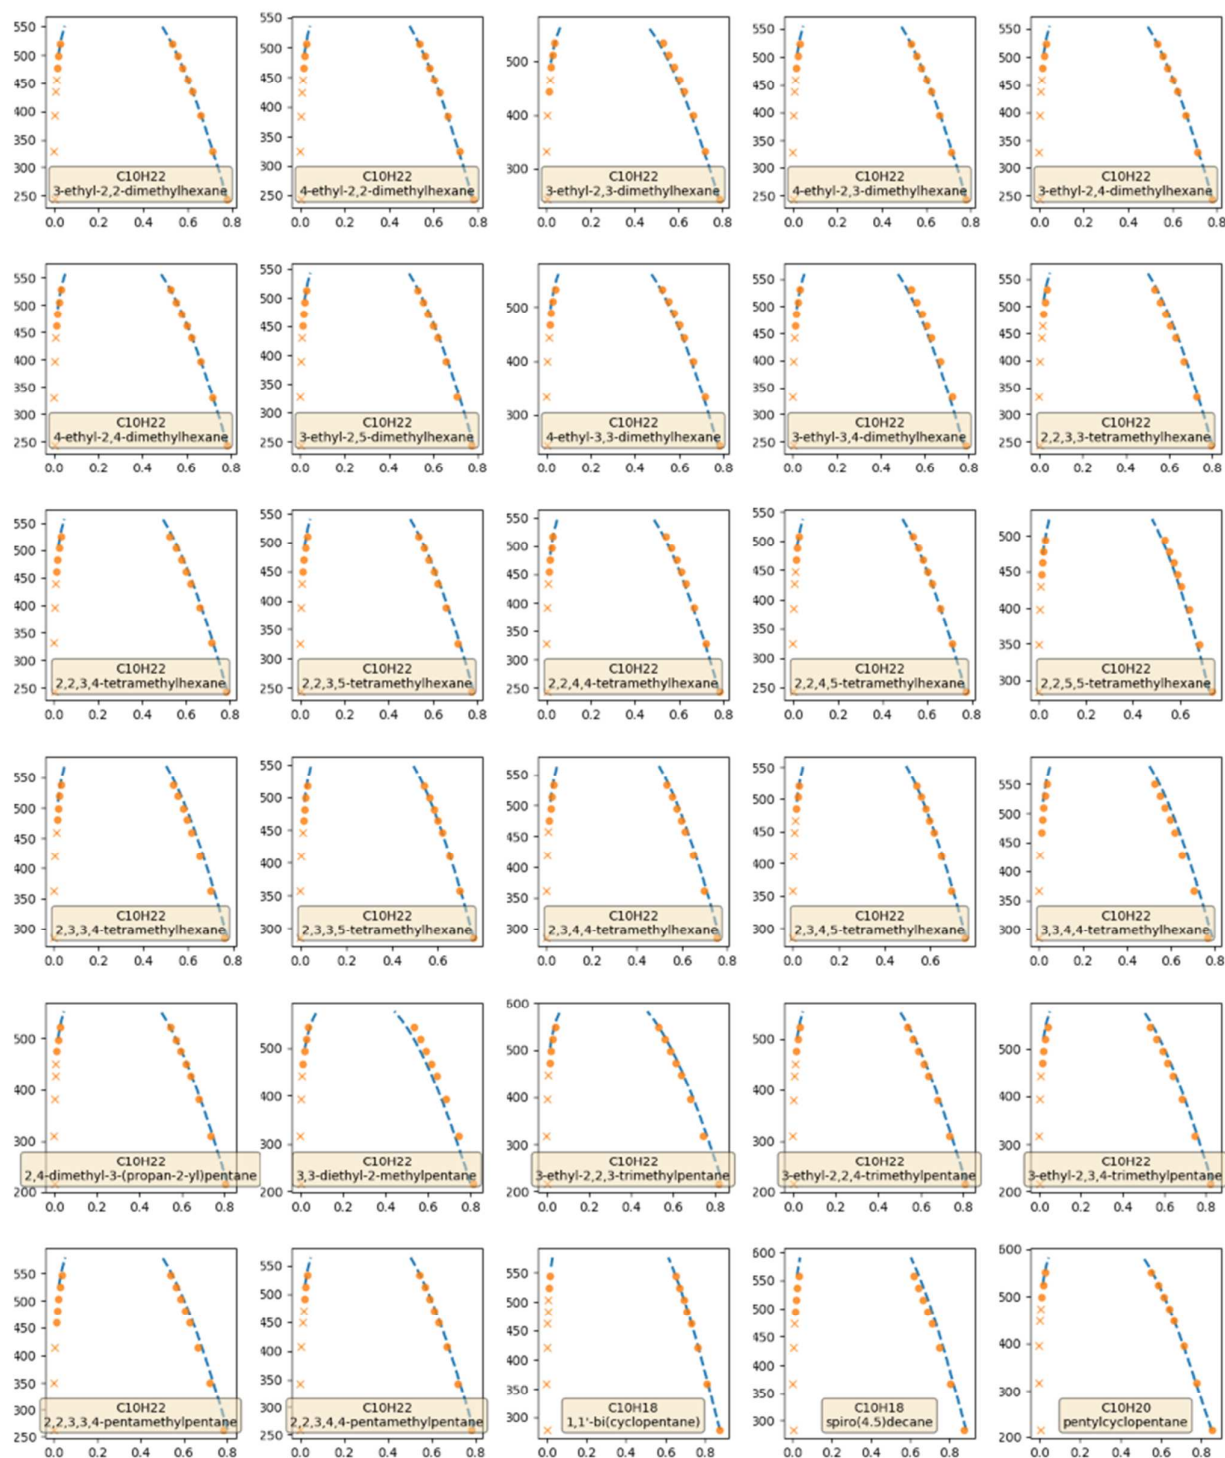

Figure S3 Comparison of predicted (dots and crosses) and experimental (lines) VLE phase diagram of 240 molecules. The cross symbol denotes less confident data (densities lower than  $0.01 \text{ g/cm}^3$ ).

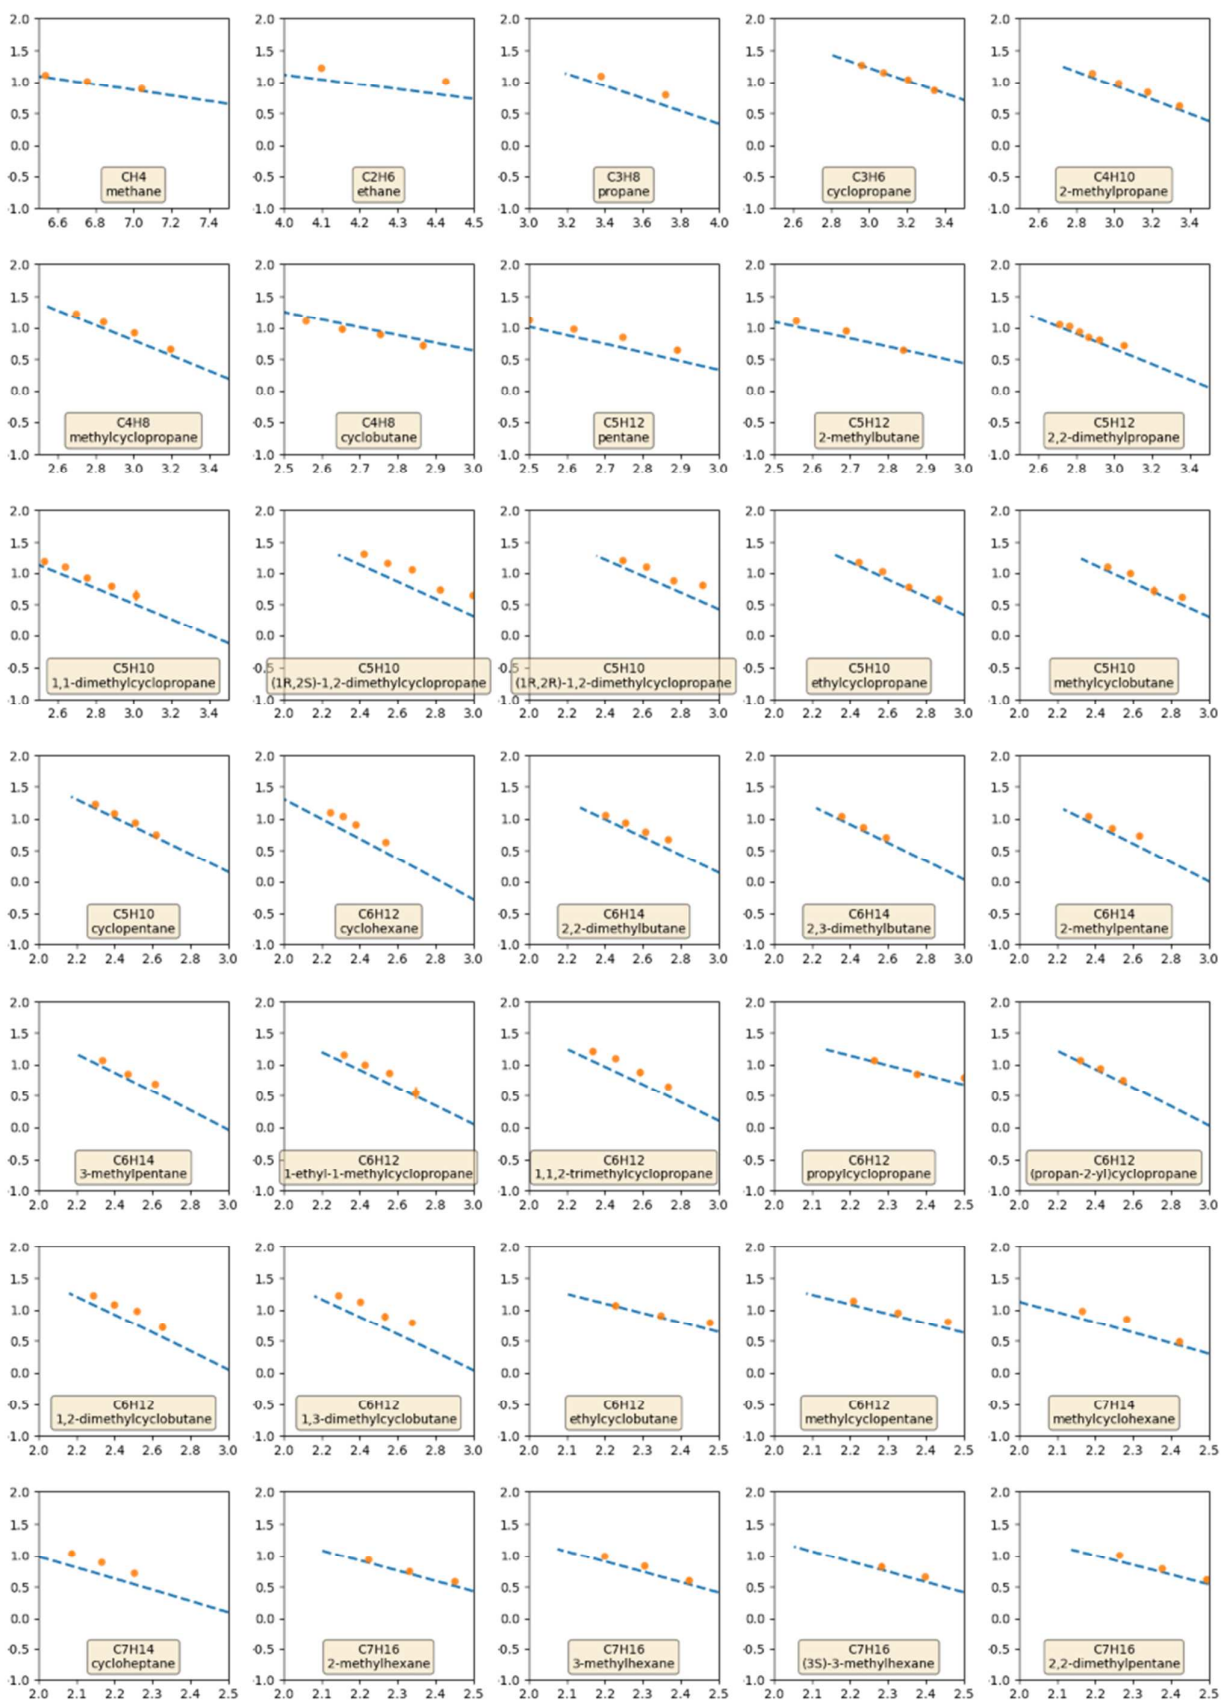

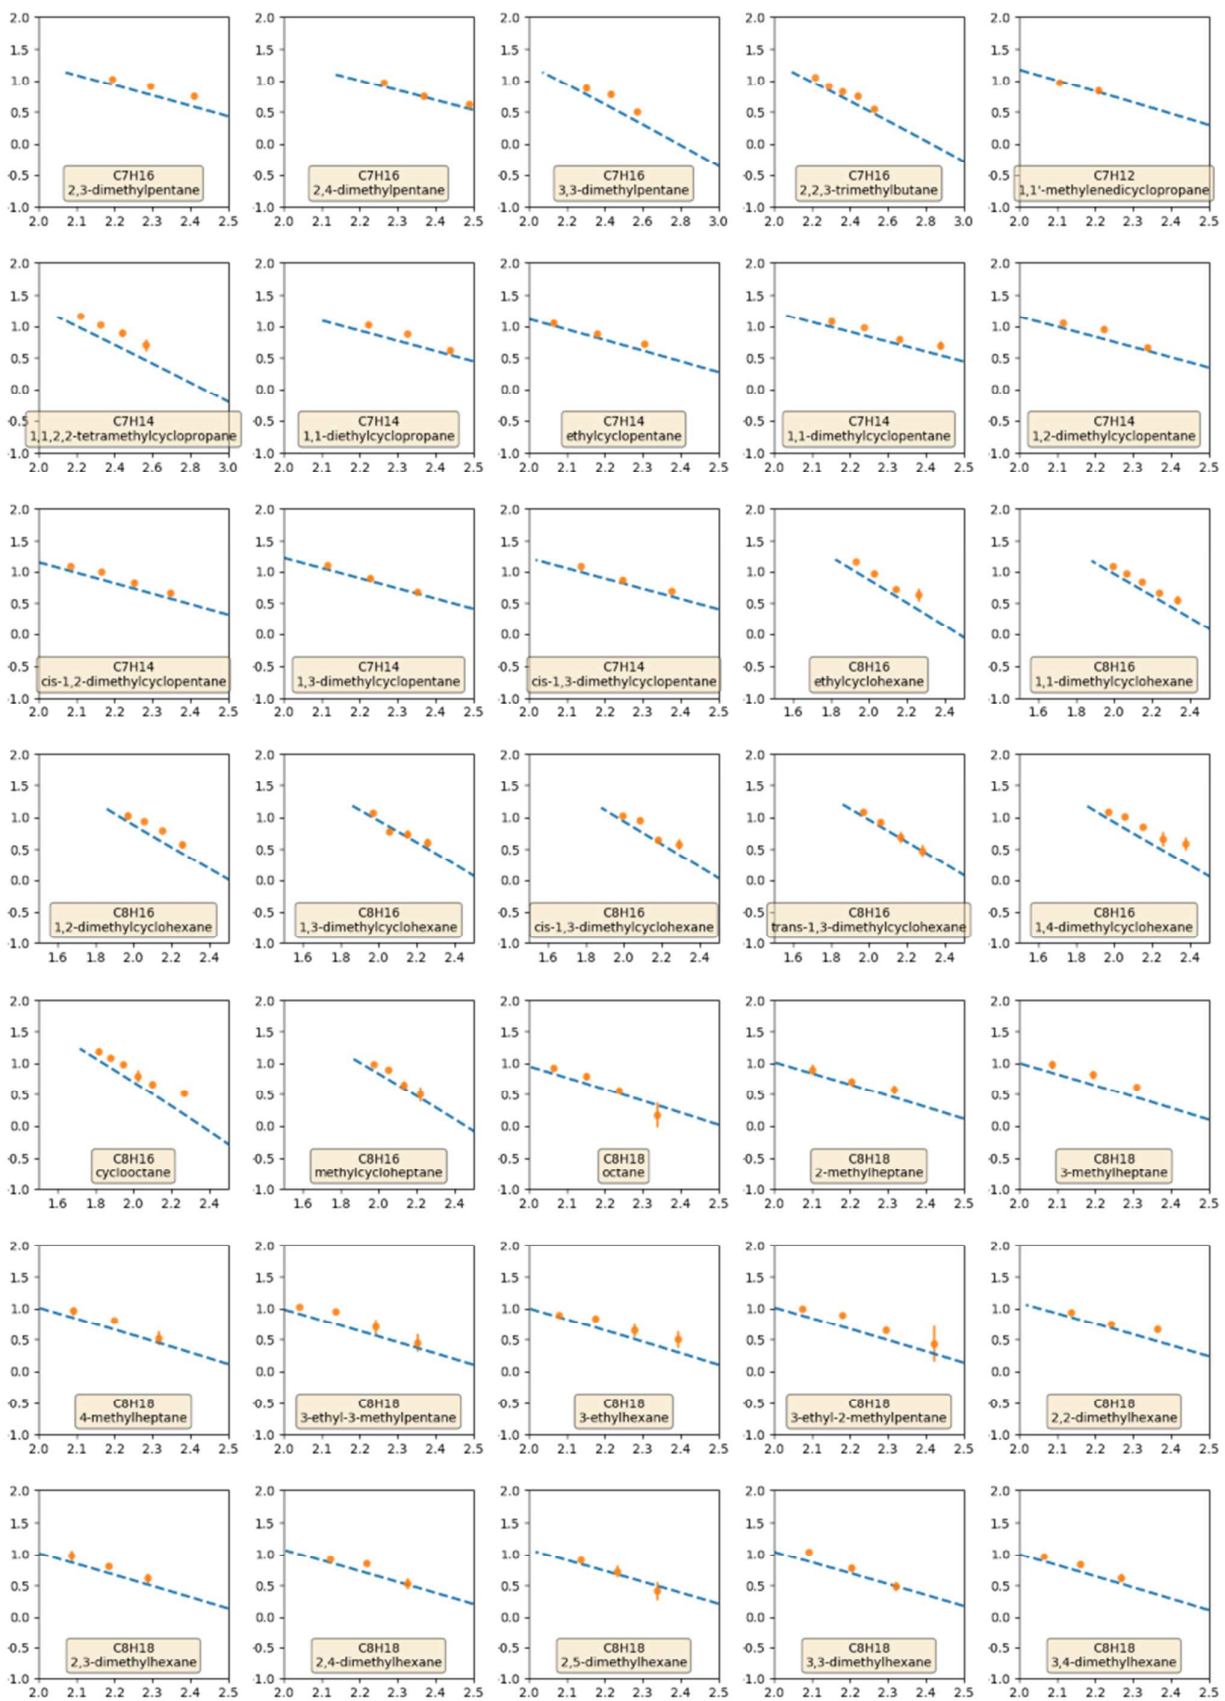



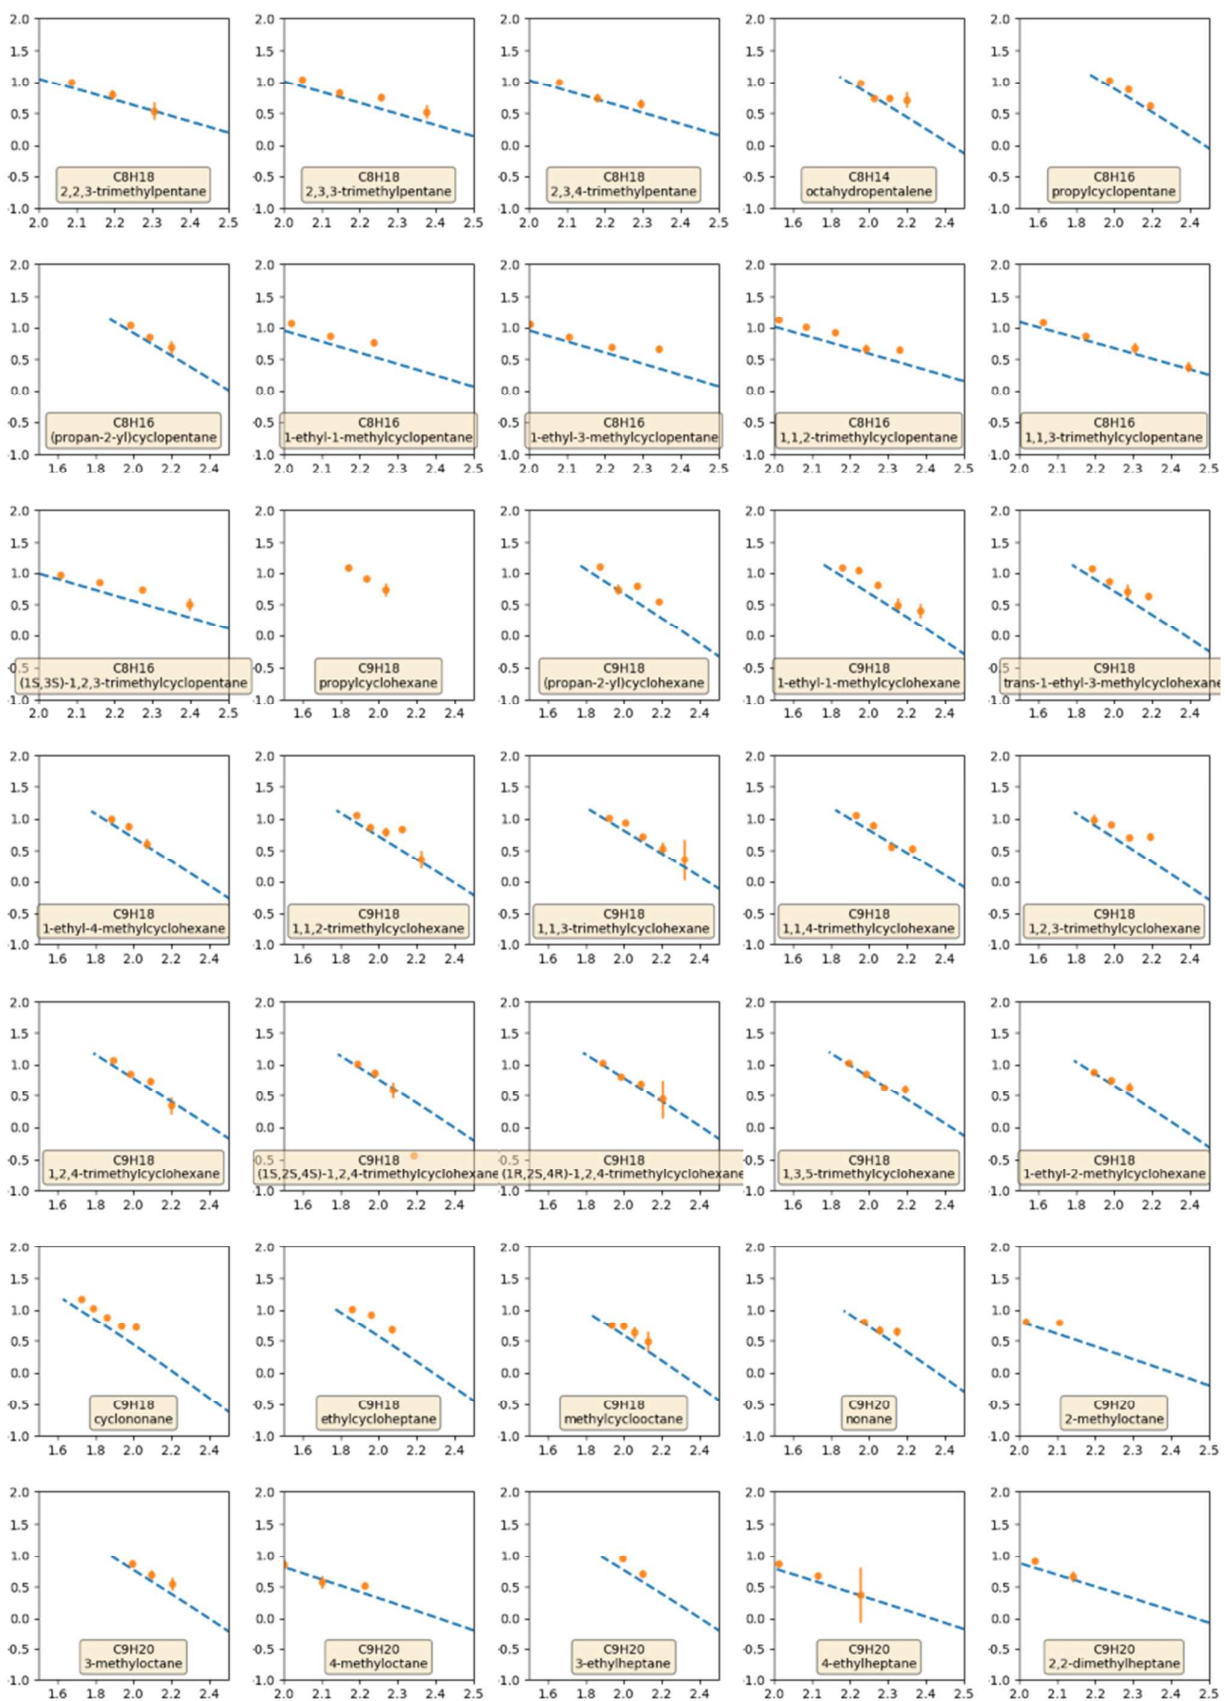



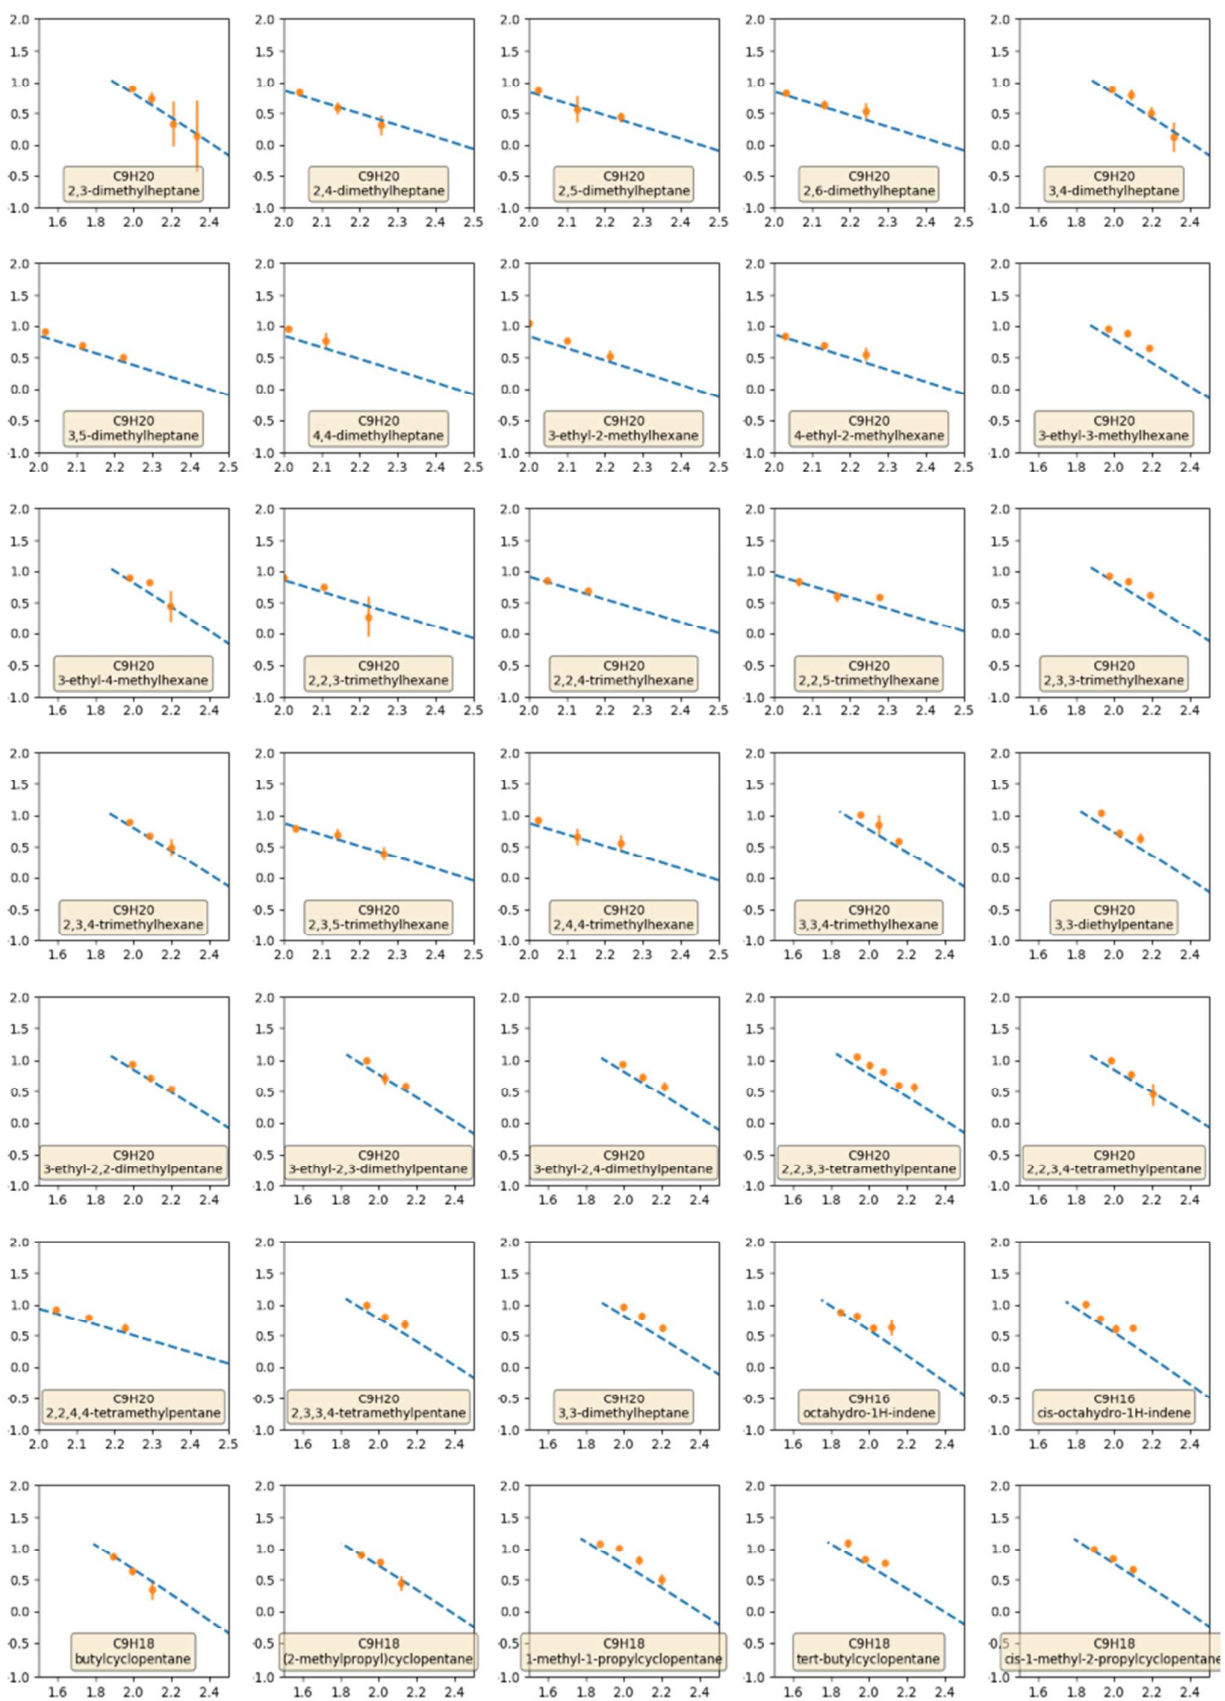

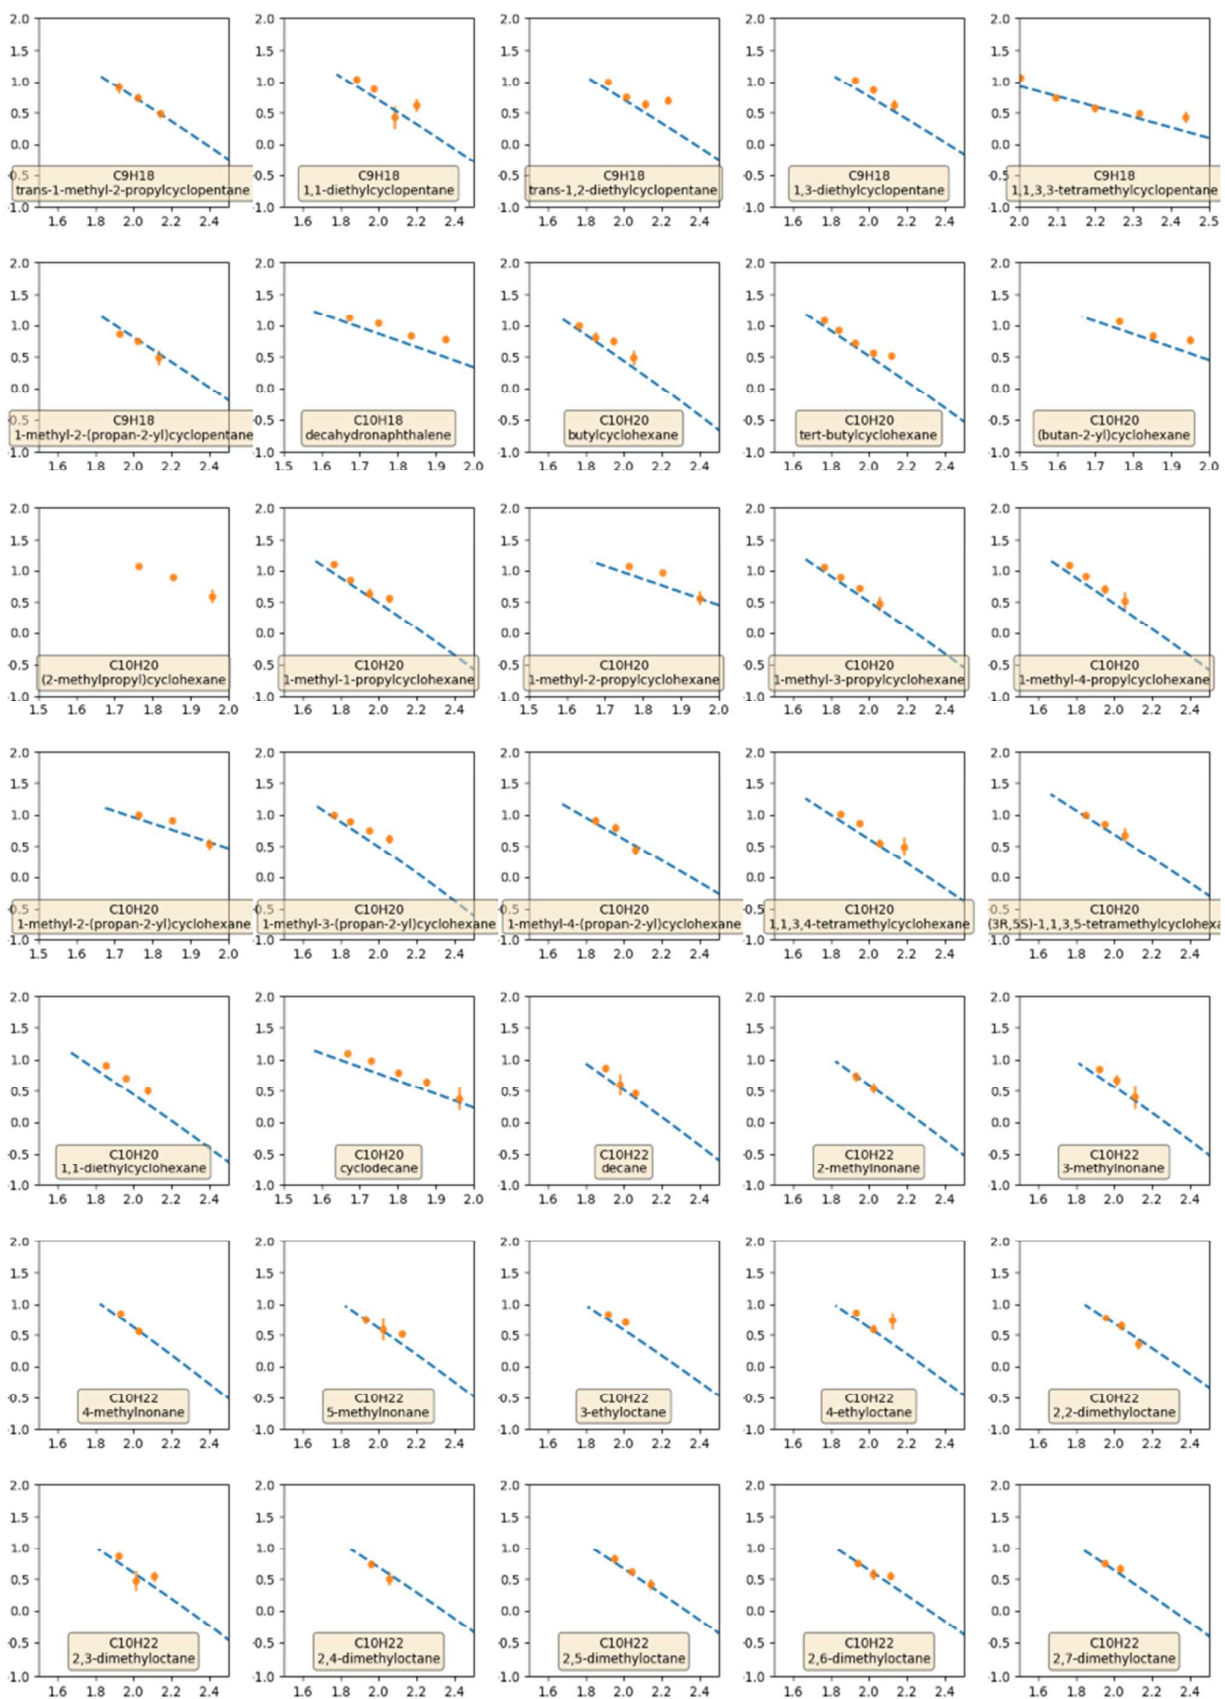

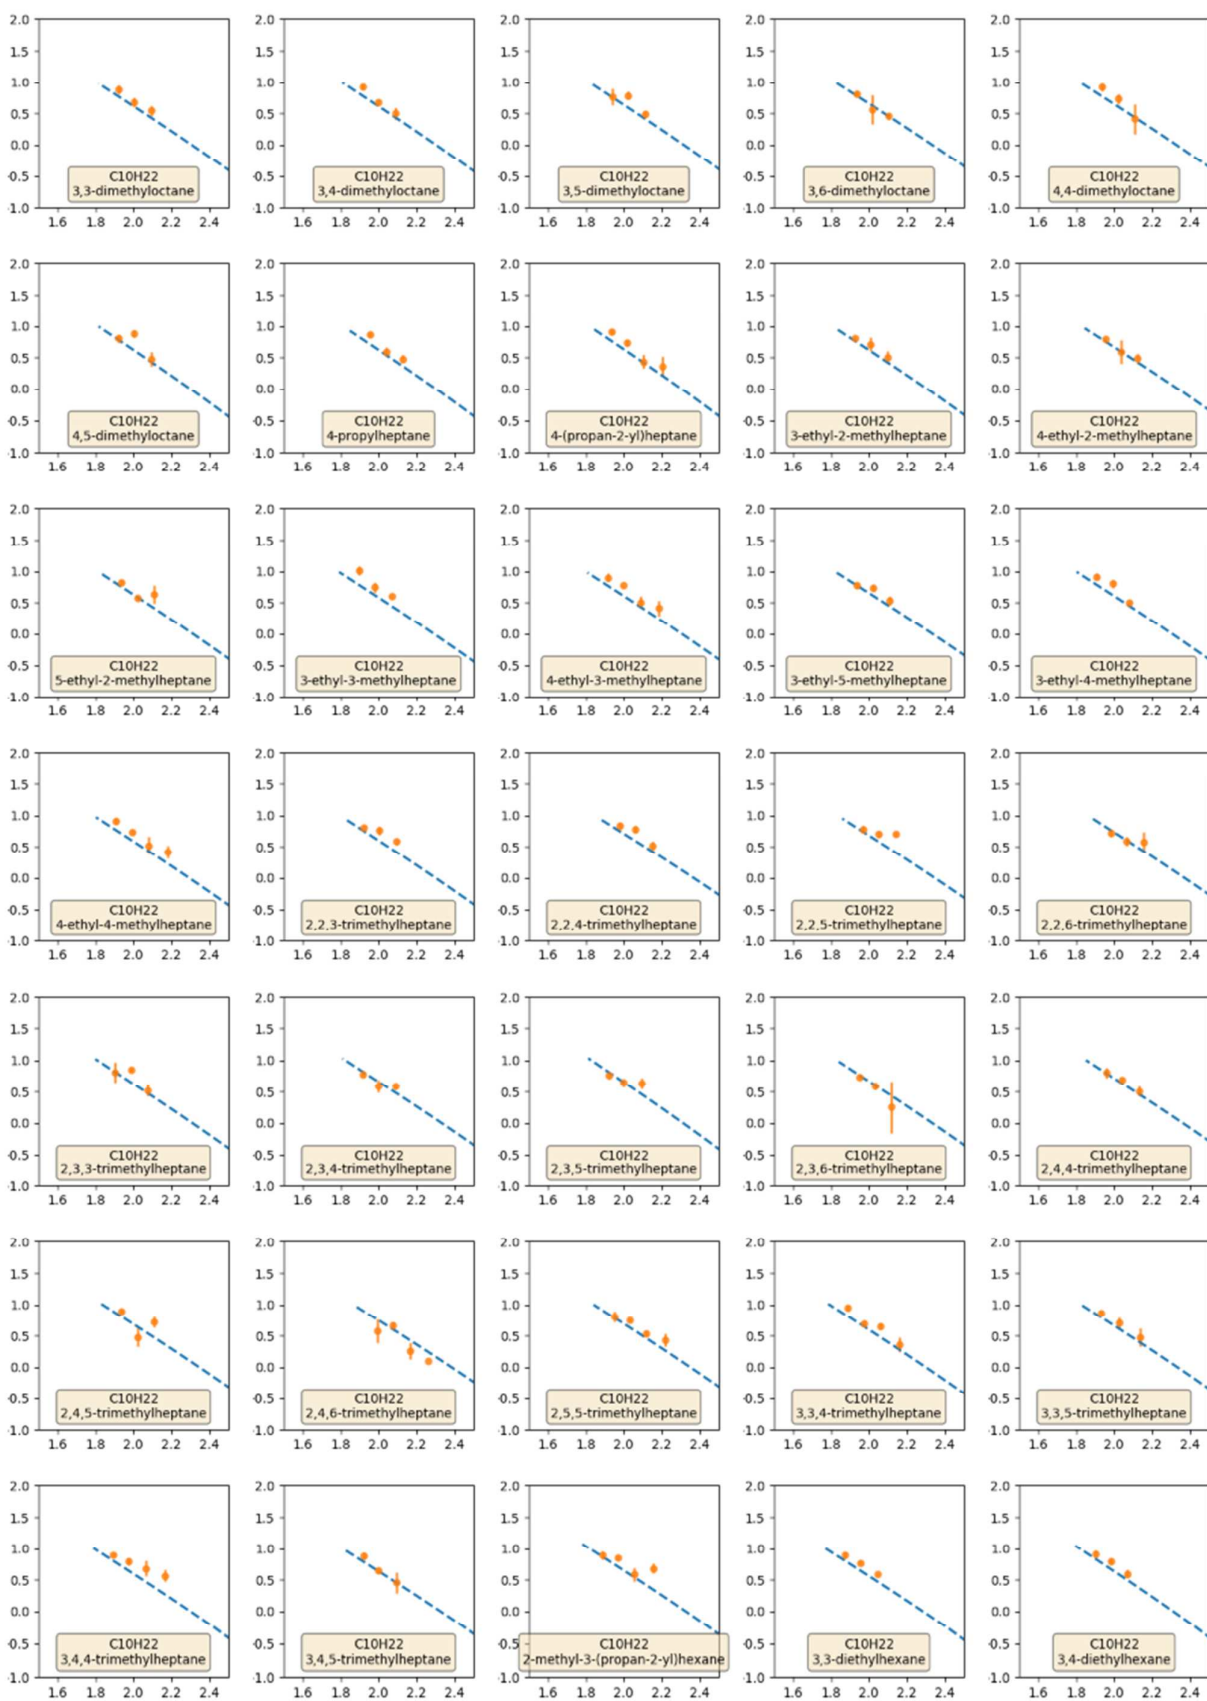

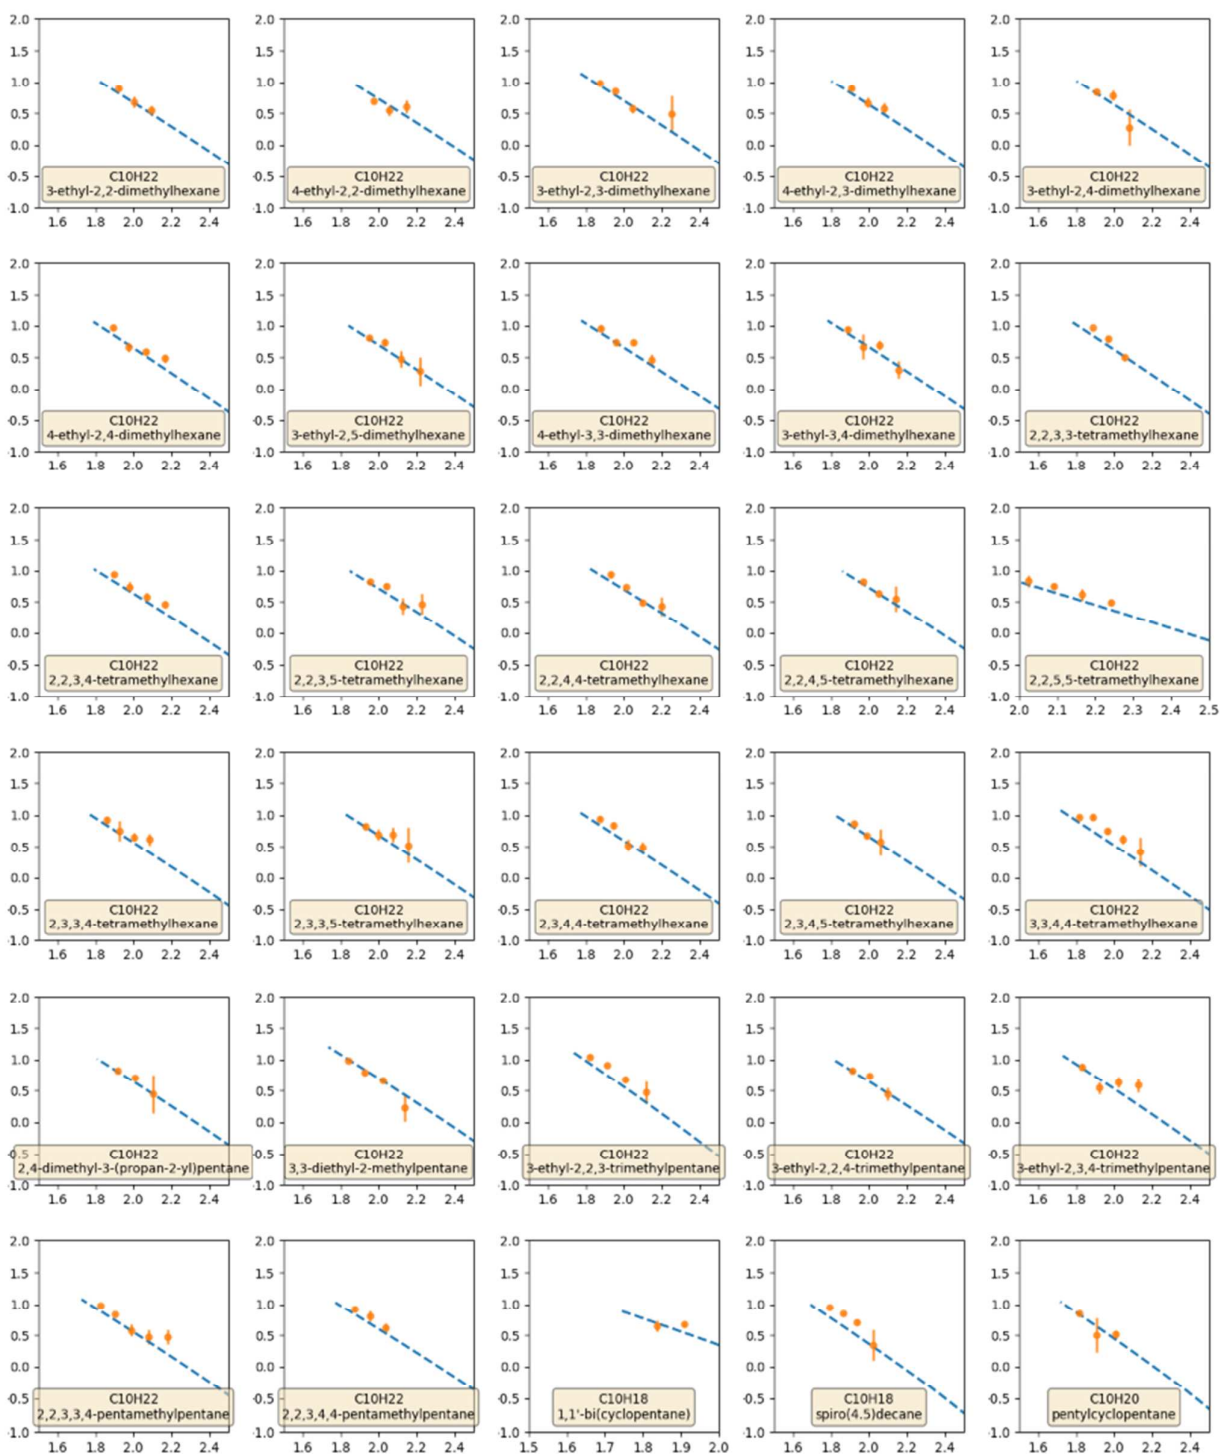

Figure S4 Comparison of predicted (dots) and experimental (lines) Clausius-Clapeyron plots of 240 molecules. The x-axis is  $\frac{1000 \text{ K}}{T}$ , y axis is  $\log_{10} \left( \frac{P}{1\text{bar}} \right)$ . The vapor pressure of systems with gas density smaller than  $0.01 \text{ g/cm}^3$  are not shown.

## References

- (1) Yaws, C. L. *Yaws' Critical Property Data for Chemical Engineers and Chemists*; Knovel, 2012.
- (2) Kim, S.; Thiessen, P. A.; Bolton, E. E.; Chen, J.; Fu, G.; Gindulyte, A.; Han, L.; He, J.; He, S.; Shoemaker, B. A.; Wang, J.; Yu, B.; Zhang, J.; Bryant, S. H. PubChem Substance and Compound databases. *Nucleic Acids Res.* **2016**, *44*, D1202-D1213.
- (3) Knovel Data Analytics. <https://app.knovel.com/web/poc/ms/discovery.html> (accessed Mar. 2018).
- (4) Diky, V.; Muzny, C. D.; Smolyanitsky, A. Y.; Bazyleva, A.; Chirico, R. D.; Magee, J. W.; Paulechka, Y.; Kazakov, A. F.; Townsend, S. A.; Lemmon, E. W. ThermoData Engine (TDE) Version 10 (Pure Compounds, Binary Mixtures, Ternary Mixtures, and Chemical Reactions): NIST Standard Reference Database 103b. **2015**.
- (5) Frenkel, M.; Chirico, R. D.; Diky, V.; Yan, X.; Dong, Q.; Muzny, C. ThermoData Engine (TDE): Software Implementation of the Dynamic Data Evaluation Concept. *J. Chem. Inf. Model.* **2005**, *45*, 816-838.
